# Supplementary material for: Overcoming the Drawbacks of Sulpiride by Means of New Crystal Forms
Source: MDPI journal article supplement (doi:10.3390/pharmaceutics14091754), 2022-08-23
Supplement: s1 [file s1]

## Supplementary Information

# Overcoming the Drawbacks of Sulpiride by means of New Crystal Forms

R. Birolo<sup>1</sup>, F. Bravetti<sup>1</sup>, S. Bordinon<sup>1</sup>, I. D'Abbrunzo<sup>2</sup>, P. P. Mazzeo<sup>3</sup>, B. Perissutti<sup>2</sup>, A. Bacchi<sup>3</sup>, M. R. Chierotti<sup>1</sup>, R. Gobetto<sup>1</sup>

<sup>1</sup>Department of Chemistry, University of Torino, Via P. Giuria 7, 10125 Torino, Italy

<sup>2</sup>Department of Chemical and Pharmaceutical Sciences, University of Trieste, P.le Europa 1, 34127 Trieste, Italy

<sup>3</sup>Department of Chemical, Life and Environmental Sustainability Sciences, University of Parma, Viale delle Scienze 17A, 43124 Parma, Italy

| Table of contents                                                                                                              | Page  |
|--------------------------------------------------------------------------------------------------------------------------------|-------|
| Table S1. Synthetic conditions for the preparation of the adducts.                                                             | 1     |
| Table S2. Lattice parameters and RMSD <sub>20</sub> of the optimised crystal structures.                                       | 2     |
| Figures S1-S12. FTIR-ATR spectra.                                                                                              | 2-6   |
| Figures S13-S24. Experimental X-ray powder patterns.                                                                           | 7-12  |
| Figures S25-S30. Experimental and calculated X-ray powder diffractograms.                                                      | 13-15 |
| Figures S31-S36. ORTEP diagrams.                                                                                               | 16-18 |
| Table S3. H-bonds interaction for all the crystal structures.                                                                  | 19    |
| Figure S37. <sup>13</sup> C CPMAS spectra of the 12 coformers.                                                                 | 19    |
| Figures S38-S39. <sup>15</sup> N CPMAS spectra of the adducts.                                                                 | 20    |
| Tables S4-S9 <sup>13</sup> C and <sup>15</sup> N experimental and computed chemical shifts and relative RMSEs for the adducts. | 21-26 |

Table S1. Synthetic conditions for the preparation of the adducts.

| Name      | API  | Coformer            | API:cof | Synthetic Strategy | Solvent      |
|-----------|------|---------------------|---------|--------------------|--------------|
| SULP-ADPA | SULP | adipic acid         | 2:1     | slurry             | ethanol      |
| SULP-PABA | SULP | 4-aminobenzoic acid | 1:1     | slurry             | acetonitrile |
| SULP-CAFA | SULP | caffeic acid        | 1:1     | slurry             | acetonitrile |
| SULP-FA   | SULP | fumaric acid        | 2:1     | slurry             | ethanol      |
| SULP-MLEA | SULP | maleic acid         | 1:1     | slurry             | acetonitrile |
| SULP-MLIA | SULP | malic acid          | 1:1     | slurry             | ethanol      |
| SULP-MLOA | SULP | malonic acid        | 1:1     | slurry             | ethanol      |
| SULP-NA   | SULP | nicotinic acid      | 1:1     | slurry             | ethanol      |
| SULP-SA   | SULP | succinic acid       | 2:1     | slurry             | acetonitrile |
| SULP-AZA  | SULP | acetazolamide       | 1:1     | slurry             | ethanol      |
| SULP-IBU  | SULP | Ibuprofen           | 1:1     | slurry             | methanol     |
| SULP-IND  | SULP | indomethacin        | 1:1     | slurry             | ethanol      |

**Table S2.** Lattice parameters and RMSD<sub>20</sub> of the optimised crystal structures of **SULP-ADPA**, **SULP-FA**, **SULP-MLEA**, **SULP-MLOA**, **SULP-IND** and **SULP-AZA**.

|                               | <b>SULP-ADPA</b> | <b>SULP-FA</b> | <b>SULP-MLEA</b> | <b>SULP-MLOA</b> | <b>SULP-IND</b> | <b>SULP-AZA</b> |
|-------------------------------|------------------|----------------|------------------|------------------|-----------------|-----------------|
| <b>Form</b>                   | salt             | salt           | salt             | salt             | salt            | salt            |
| <b>a /Å</b>                   | 7.0710           | 7.1110         | 7.7722           | 7.1891           | 7.2703          | 9.6115          |
| <b>b /Å</b>                   | 8.1910           | 8.0557         | 10.8656          | 35.4391          | 7.9850          | 11.3523         |
| <b>c /Å</b>                   | 17.6041          | 16.4868        | 12.3374          | 8.1768           | 29.0684         | 22.3570         |
| <b><math>\alpha</math> /°</b> | 85.0323          | 81.6188        | 90.0000          | 90.0000          | 93.7353         | 90.0000         |
| <b><math>\beta</math> /°</b>  | 82.3725          | 86.4063        | 94.3452          | 103.1188         | 91.5454         | 99.0724         |
| <b><math>\gamma</math> /°</b> | 78.5038          | 76.3458        | 90.0000          | 90.0000          | 102.6176        | 90.0000         |
| <b>Volume /Å<sup>3</sup></b>  | 988.408          | 907.546        | 1038.900         | 2028.880         | 1641.790        | 2408.910        |
| <b>RMSD<sub>20</sub></b>      | 0.144            | 0.142          | 0.138            | 0.160            | 0.189           | 0.106           |

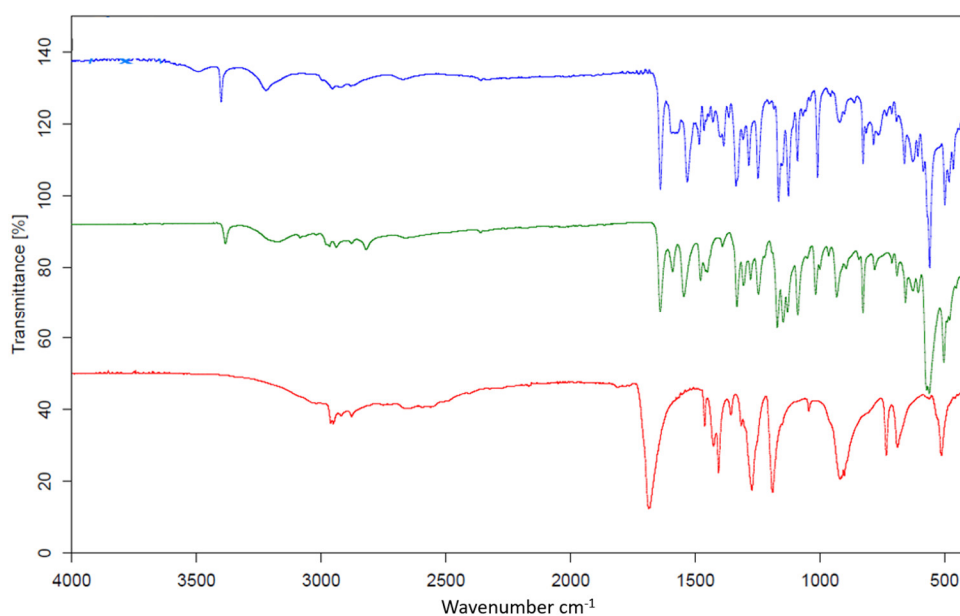

**Figure S1.** FTIR-ATR spectra of **SUL-ADPA** (blue), **SULP** (green) and **ADPA** (red).

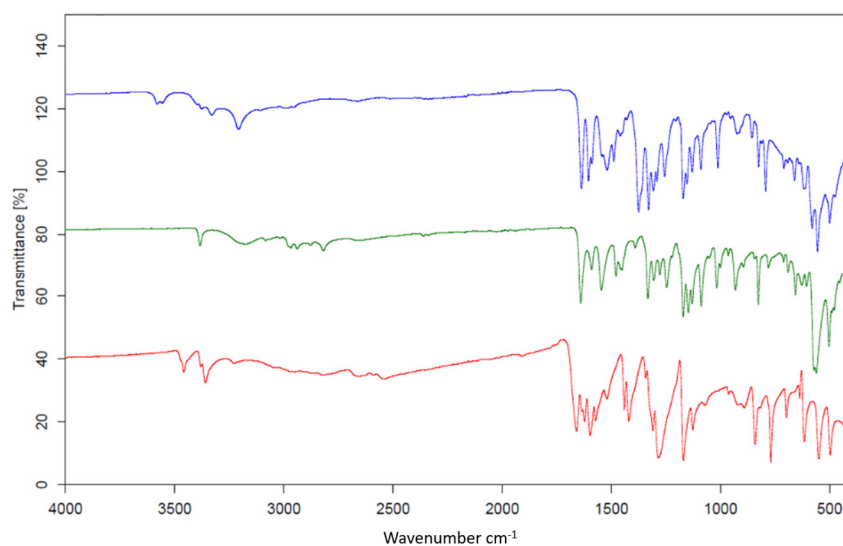

**Figure S2.** FTIR-ATR spectra of **SUL-PABA** (blue), Sulp (green) and PABA (red).

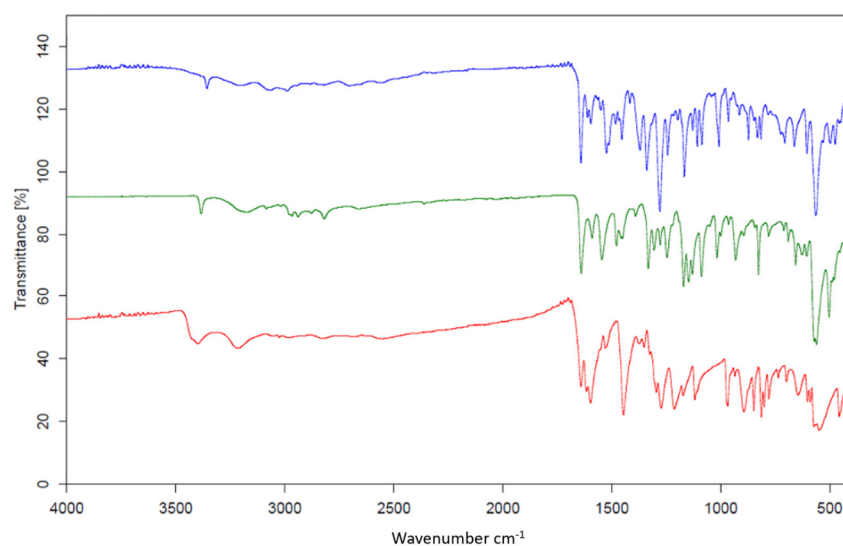

**Figure S3.** FTIR-ATR spectra of **SUL-CAFA** (blue), Sulp (green) and CAFA (red).

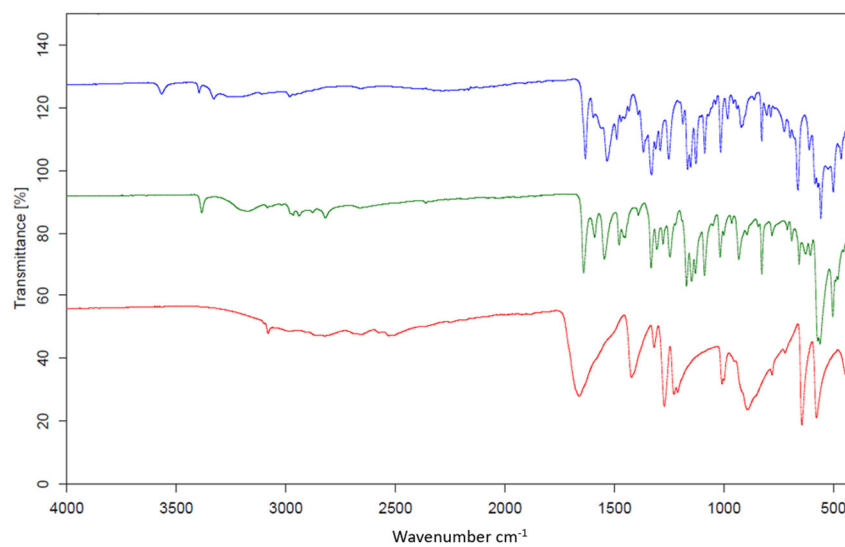

**Figure S4.** FTIR-ATR spectra of **SUL-FA** (blue), Sulp (green) and FA (red).

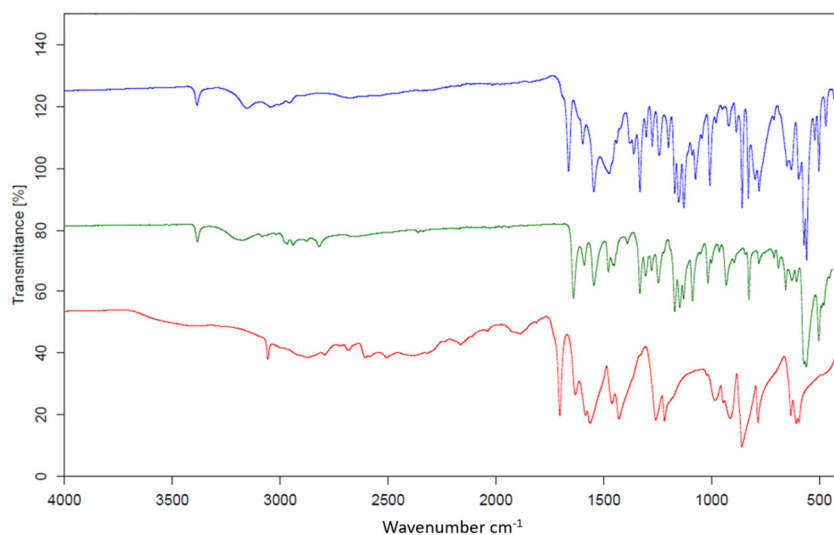

**Figure S5.** FTIR-ATR spectra of **SUL-MLEA** (blue), **Sulp** (green) and **MLEA** (red).

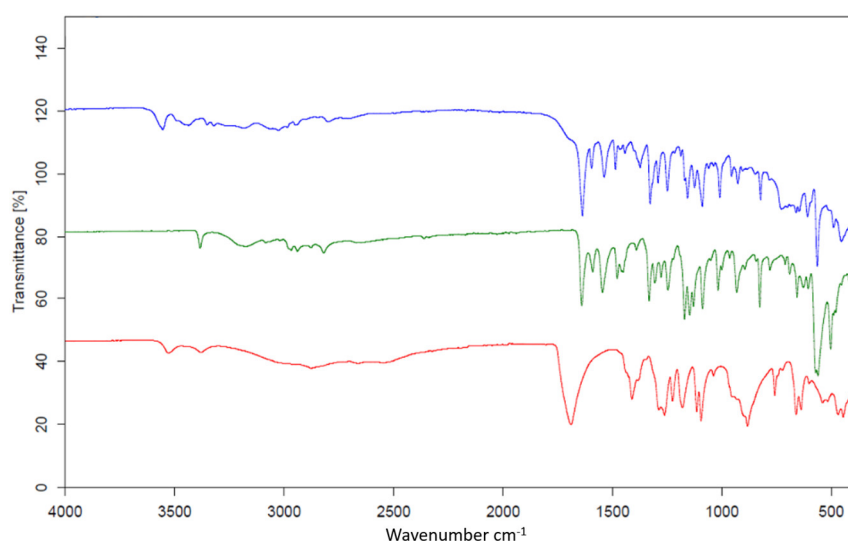

**Figure S6.** FTIR-ATR spectra of **SUL-MLIA** (blue), **Sulp** (green) and **MLIA** (red).

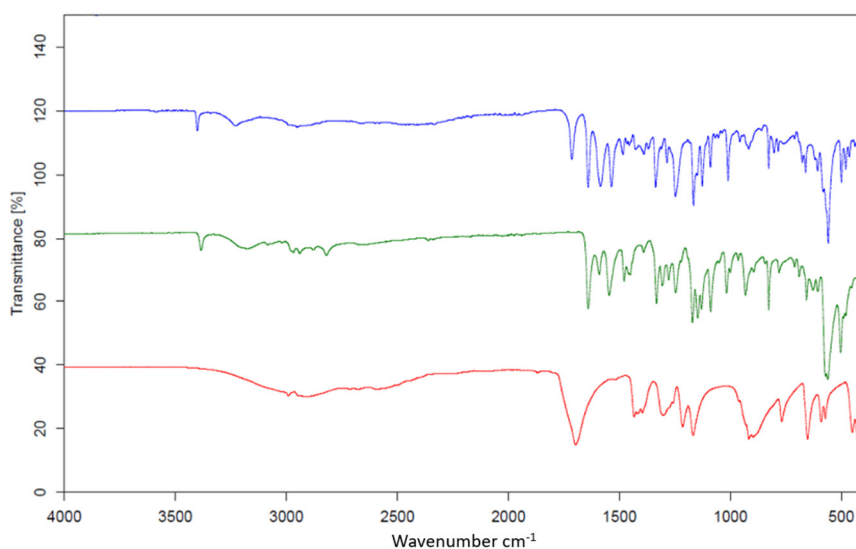

**Figure S7.** FTIR-ATR spectra of **SUL-MLOA** (blue), **Sulp** (green) and **MLOA** (red).

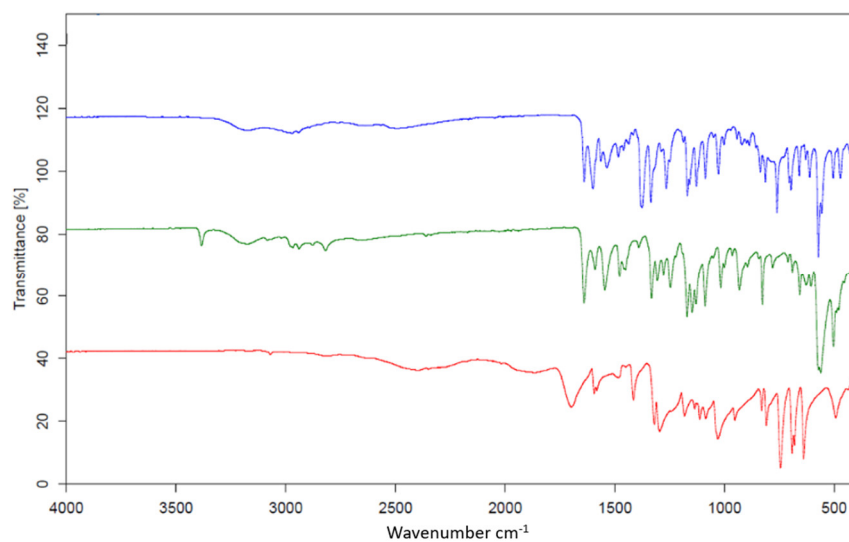

**Figure S8.** FTIR-ATR spectra of **SUL-NA** (blue), Sulp (green) and NA (red).

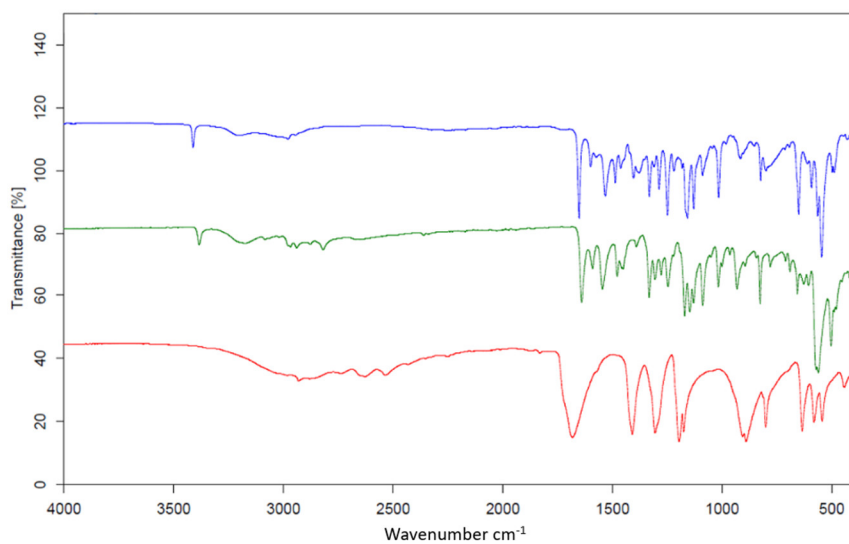

**Figure S9.** FTIR-ATR spectra of **SUL-SA** (blue), Sulp (green) and SA (red).

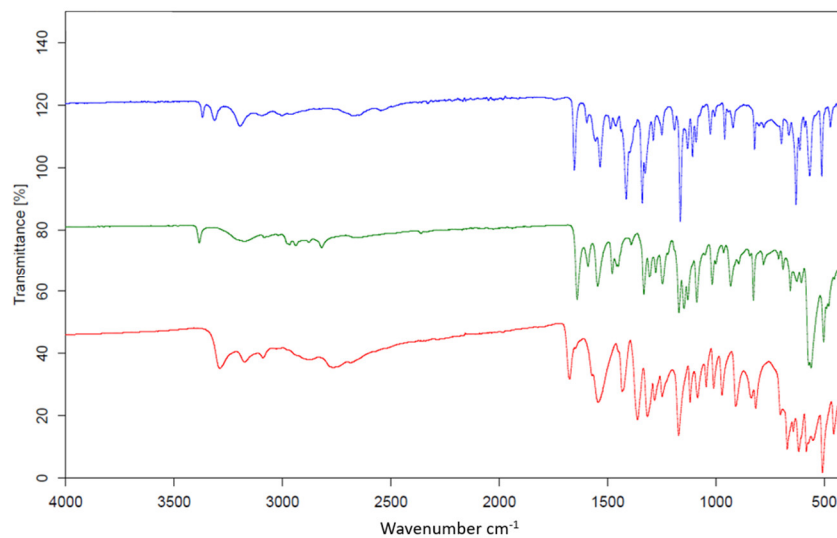

**Figure S10.** FTIR-ATR spectra of **SUL-AZA** (blue), Sulp (green) and AZA (red).

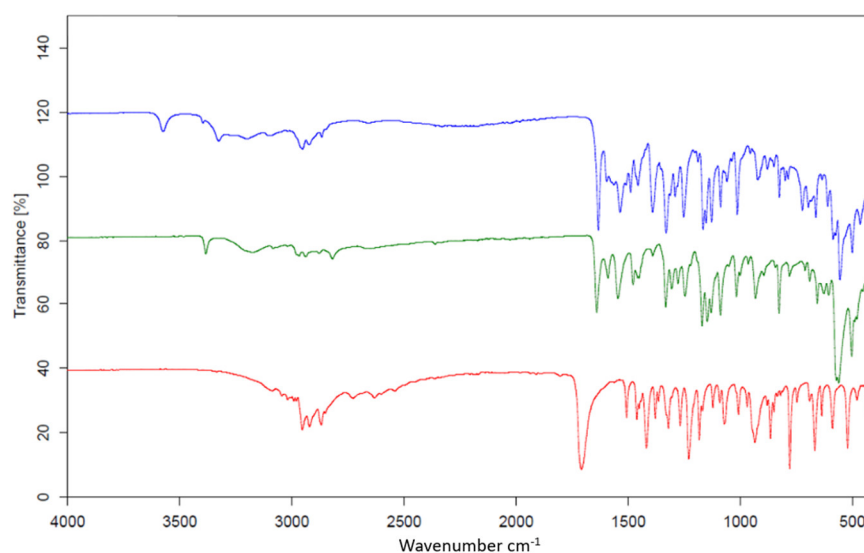

**Figure S11.** FTIR-ATR spectra of **SUL-IBU** (blue), Sulp (green) and IBU (red).

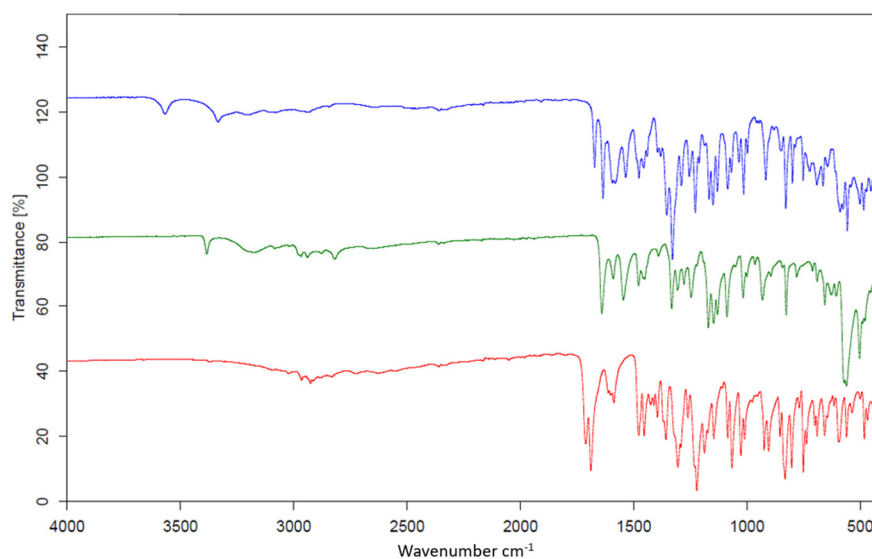

**Figure S12.** FTIR-ATR spectra of **SUL-IND** (blue), Sulp (green) and IND (red).

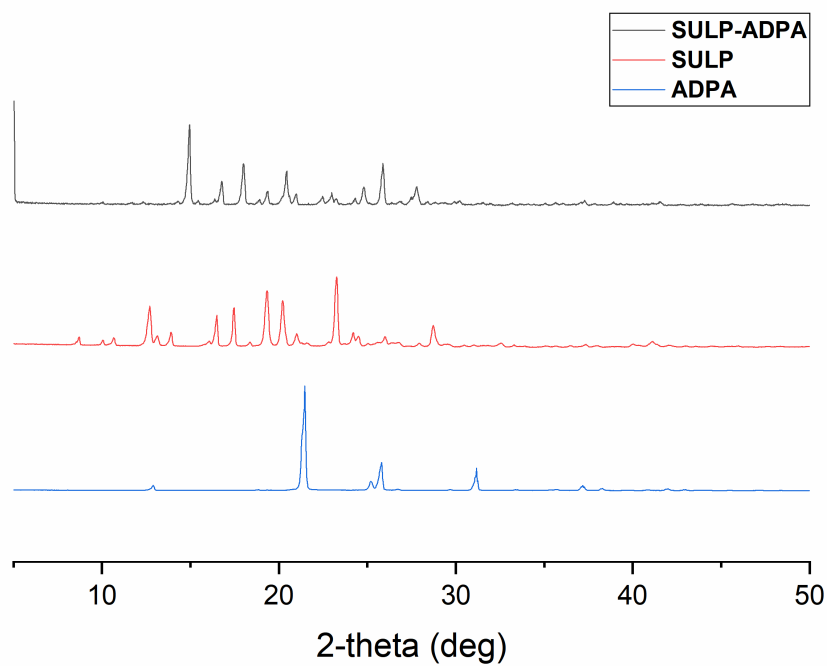

**Figure S13.** Experimental X-ray powder patterns of **SULP-ADPA** (black), **SULP** (red), **ADPA** (blue).

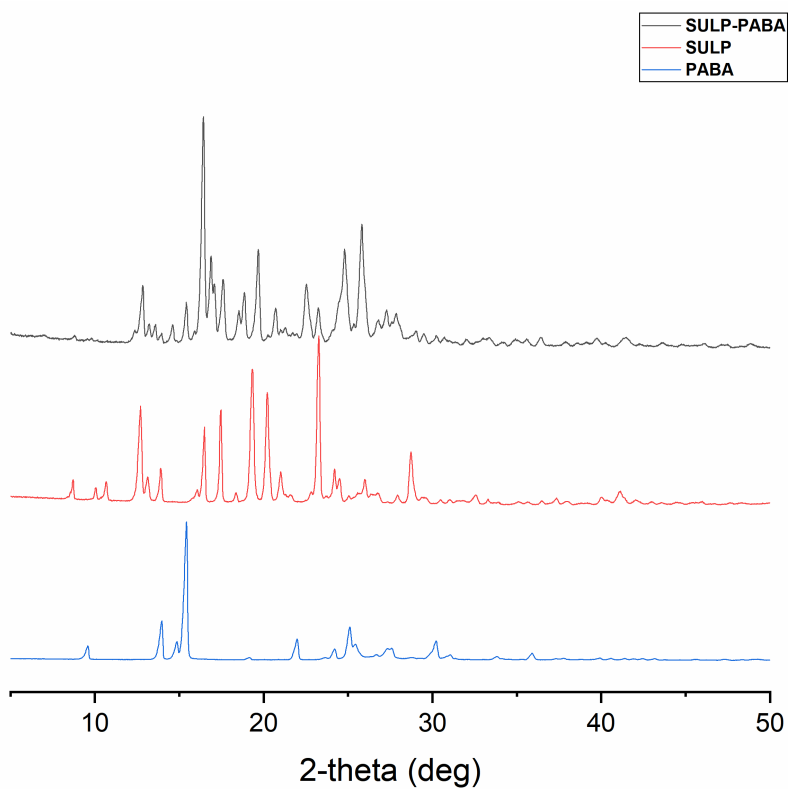

**Figure S14.** Experimental X-ray powder patterns of **SULP-PABA** (black), **SULP** (red), **PABA** (blue).

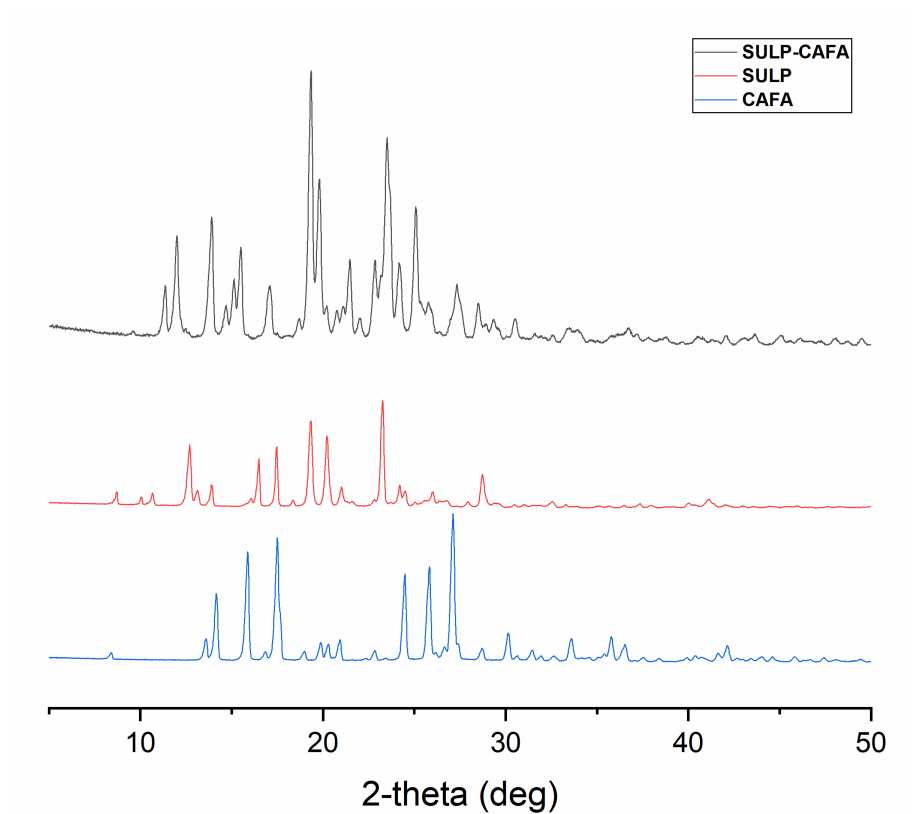

**Figure S15.** Experimental X-ray powder patterns of **SULP-CAFA** (black), **SULP** (red), **CAFA** (blue).

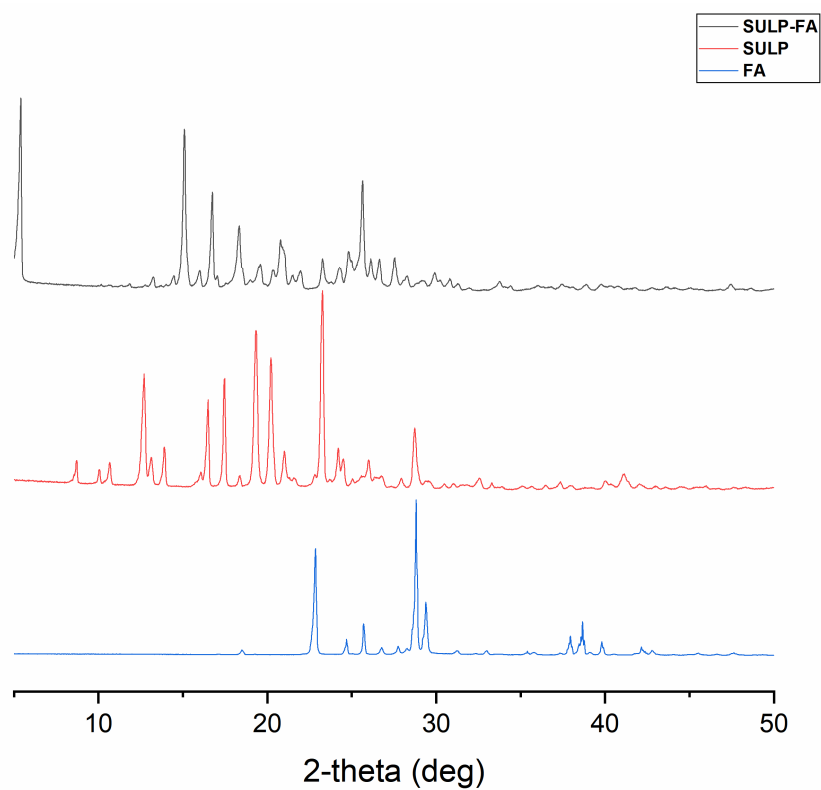

**Figure S16.** Experimental X-ray powder patterns of **SULP-FA** (black), **SULP** (red), **FA** (blue).



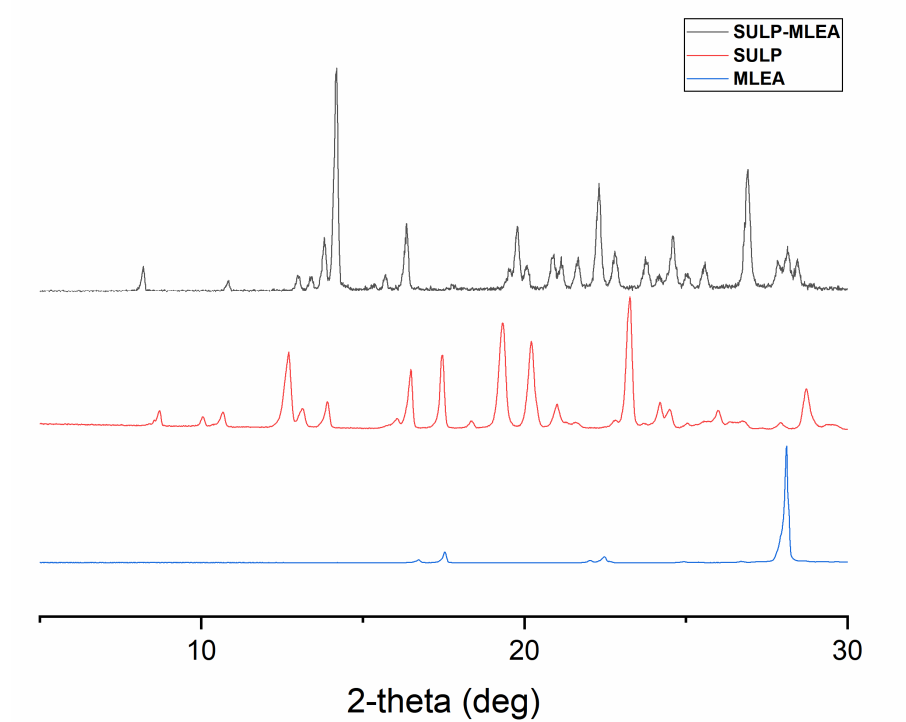

**Figure S17.** Experimental X-ray powder patterns of **SULP-MLEA** (black), **SULP** (red), **MLEA** (blue).

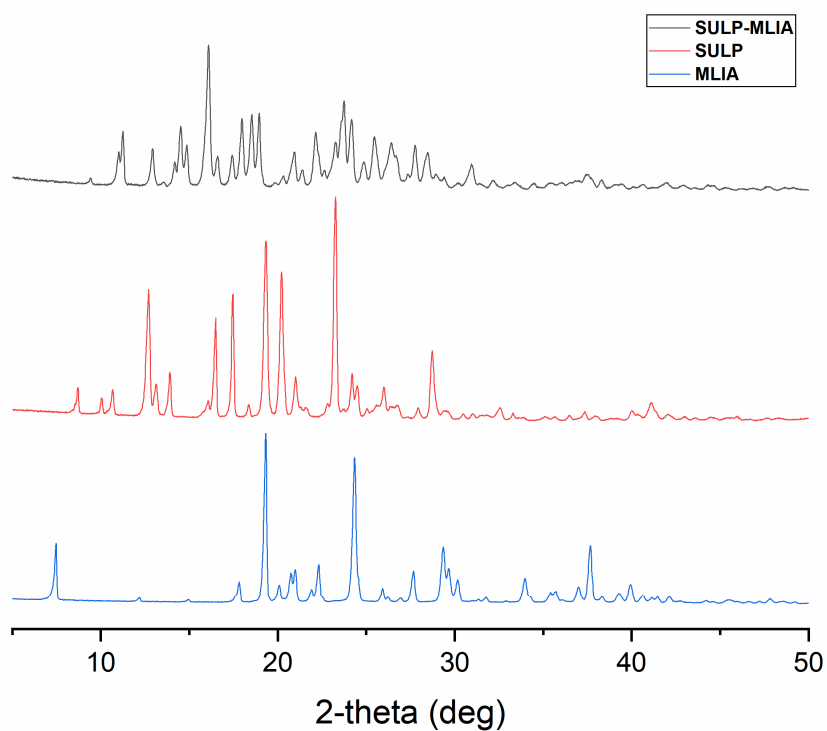

**Figure S18.** Experimental X-ray powder patterns of **SULP-MLIA** (black), **SULP** (red), **MLIA** (blue).

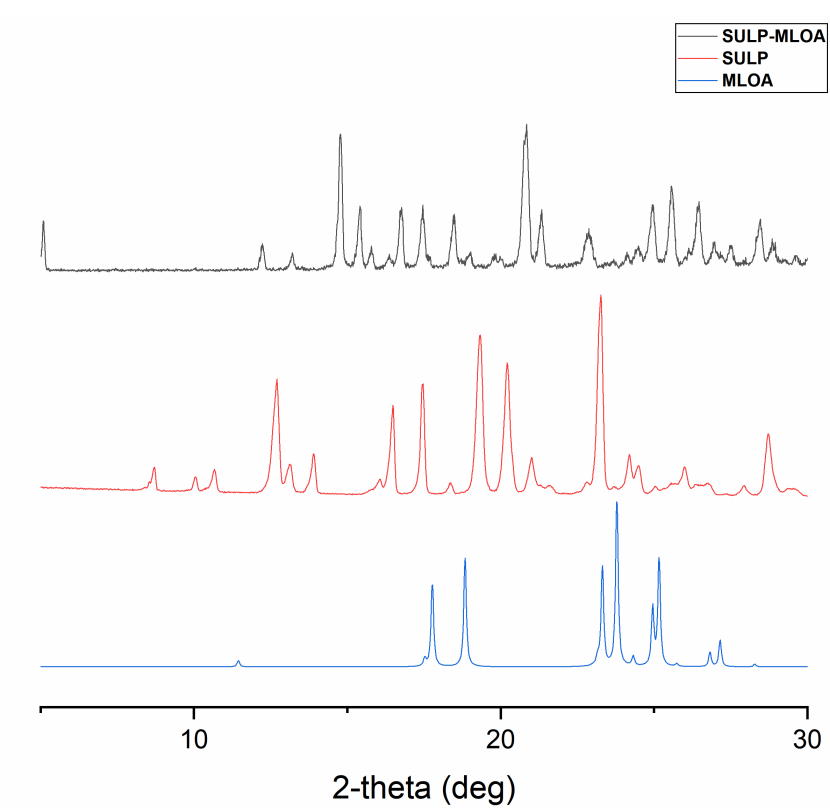

**Figure S19.** Experimental X-ray powder patterns of **SULP-MLOA** (black), **SULP** (red), **MLOA** (blue).

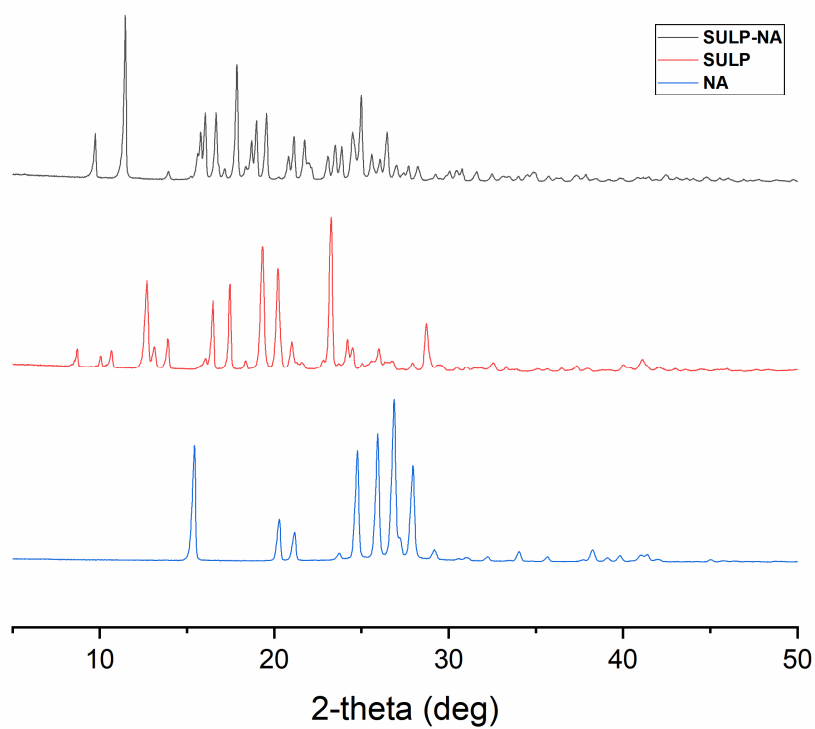

**Figure S20.** Experimental X-ray powder patterns of **SULP-NA** (black), **SULP** (red), **NA** (blue)

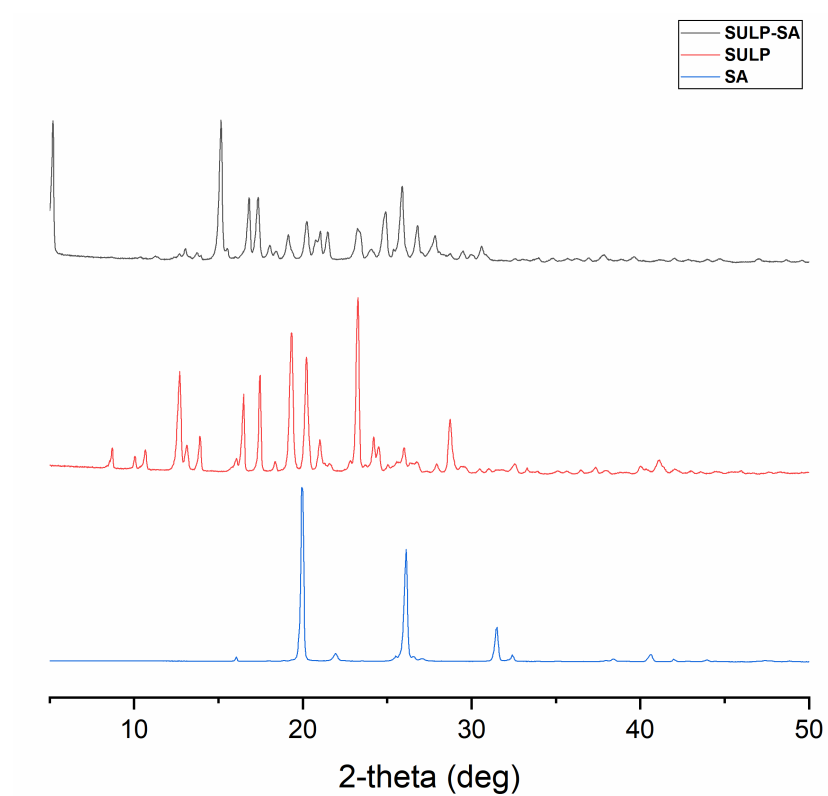

**Figure S21.** Experimental X-ray powder patterns of **SULP-SA** (black), **SULP** (red), **SA** (blue).

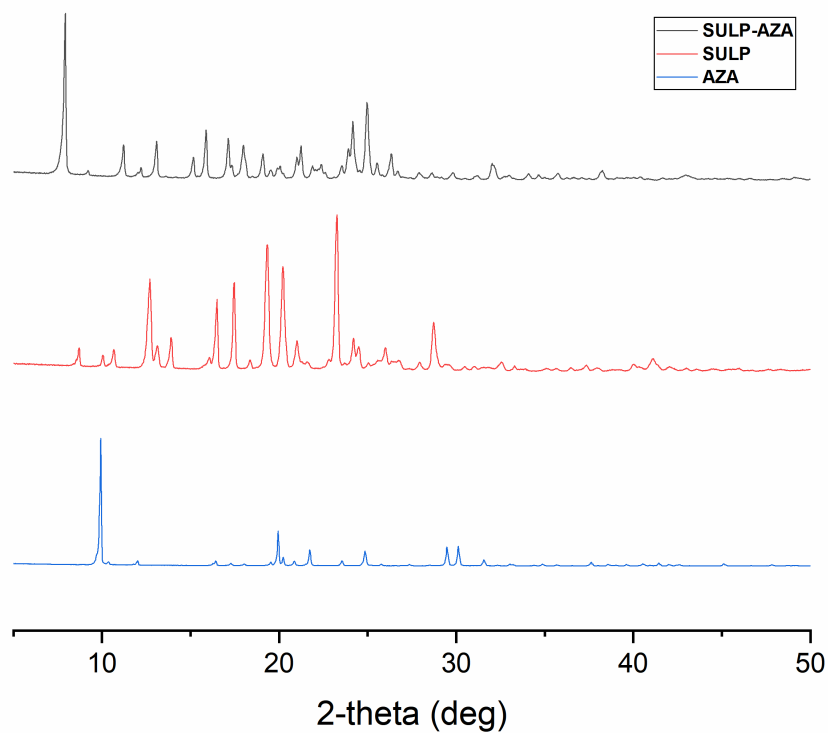

**Figure S22.** Experimental X-ray powder patterns of **SULP-AZA** (black), **SULP** (red), **AZA** (blue).

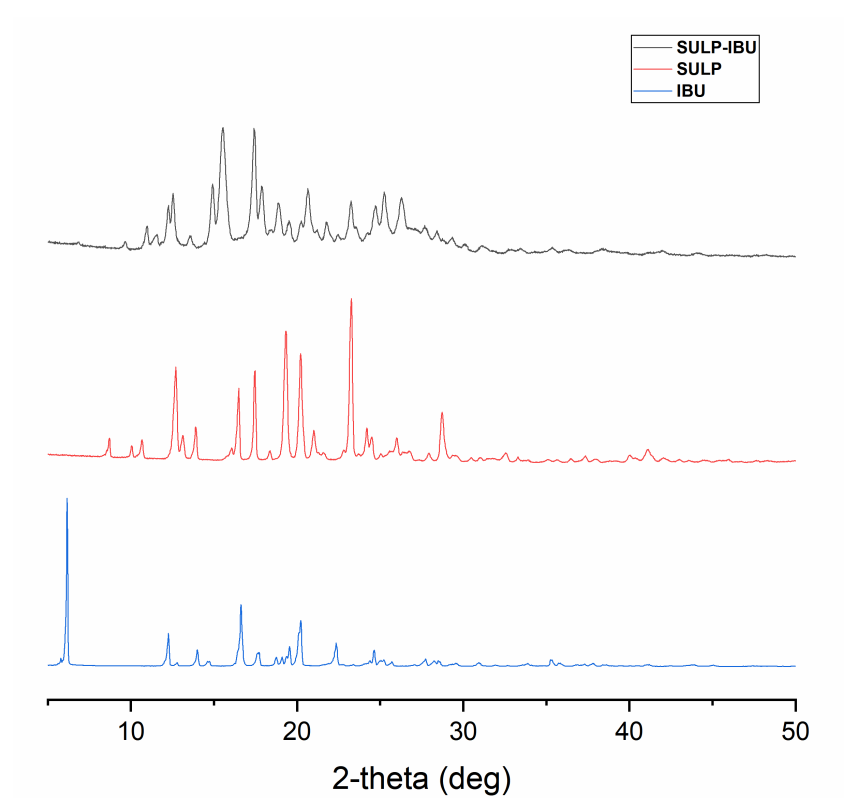

**Figure S23.** Experimental X-ray powder patterns of **SULP-IBU** (black), **SULP** (red), **IBU** (blue).

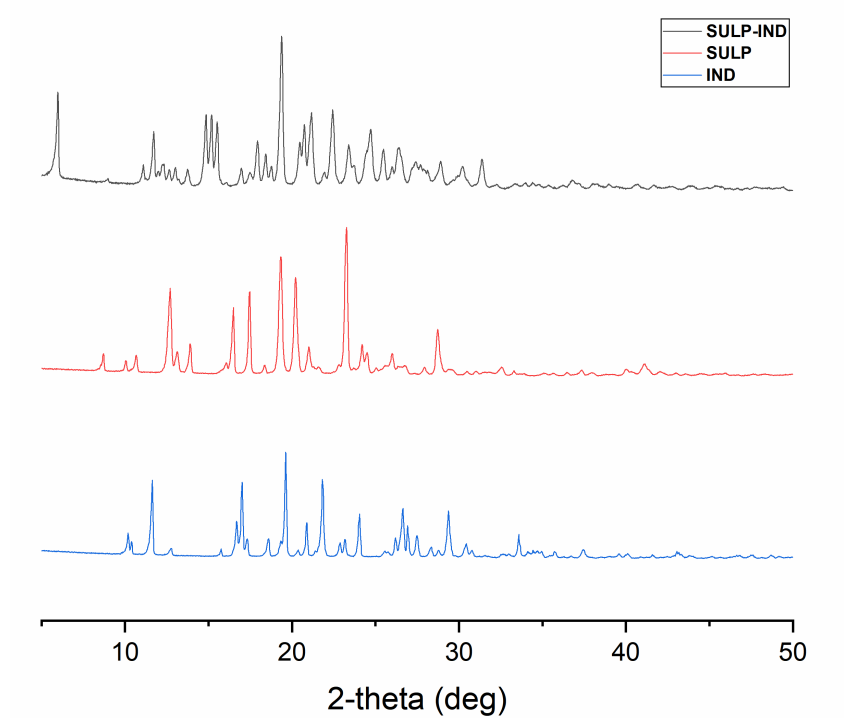

**Figure S24.** Experimental X-ray powder patterns of **SULP-IND** (black), **SULP** (red), **IND** (blue).

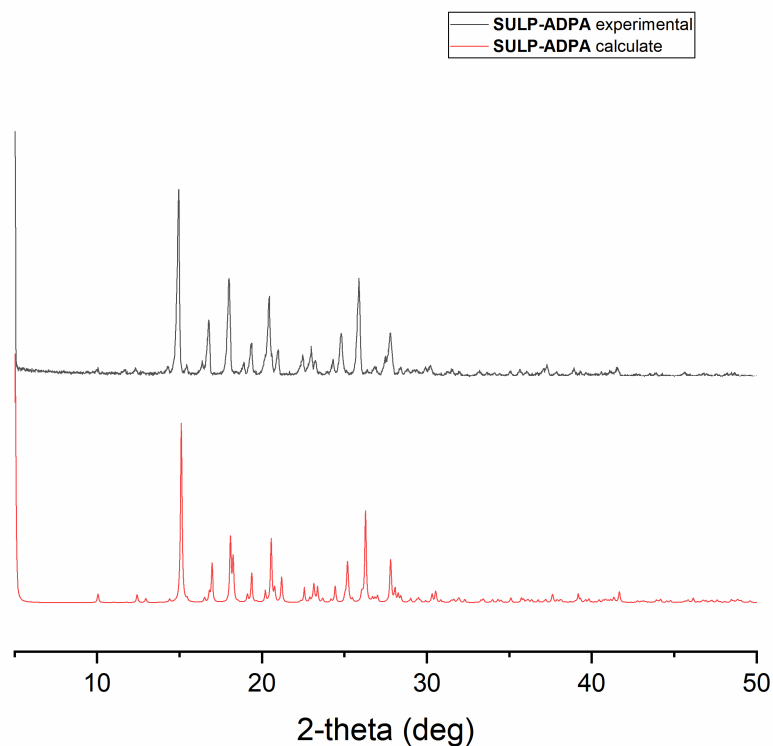

**Figure S25.** Superimposition of the experimental X-ray powder diffractogram collected on the bulk powder of **SULP-ADPA** and the simulated powder pattern calculated from the structure solved via SCXRD.

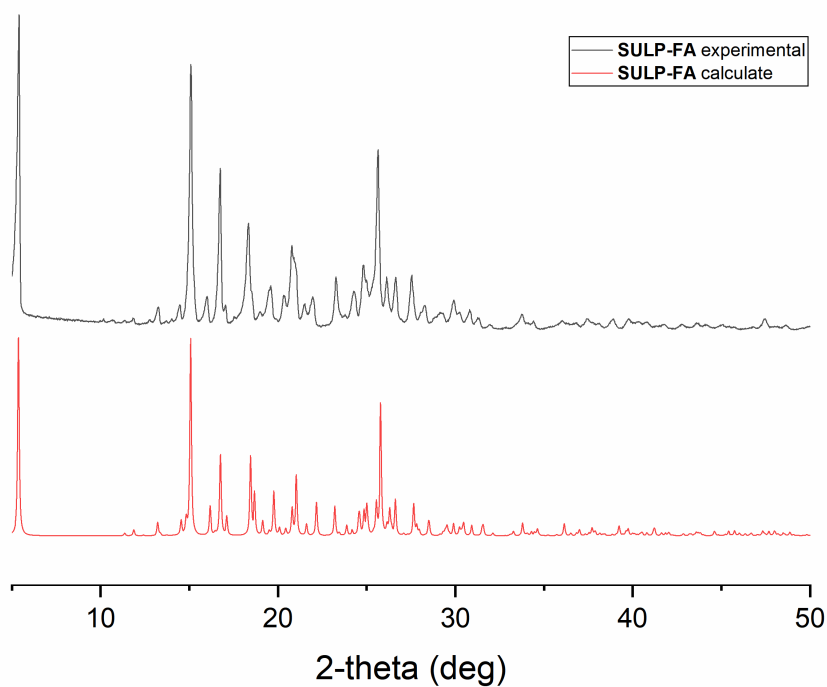

**Figure S26.** Superimposition of the experimental X-ray powder diffractogram collected on the bulk powder of **SULP-FA** and the simulated powder pattern calculated from the structure solved via SCXRD.

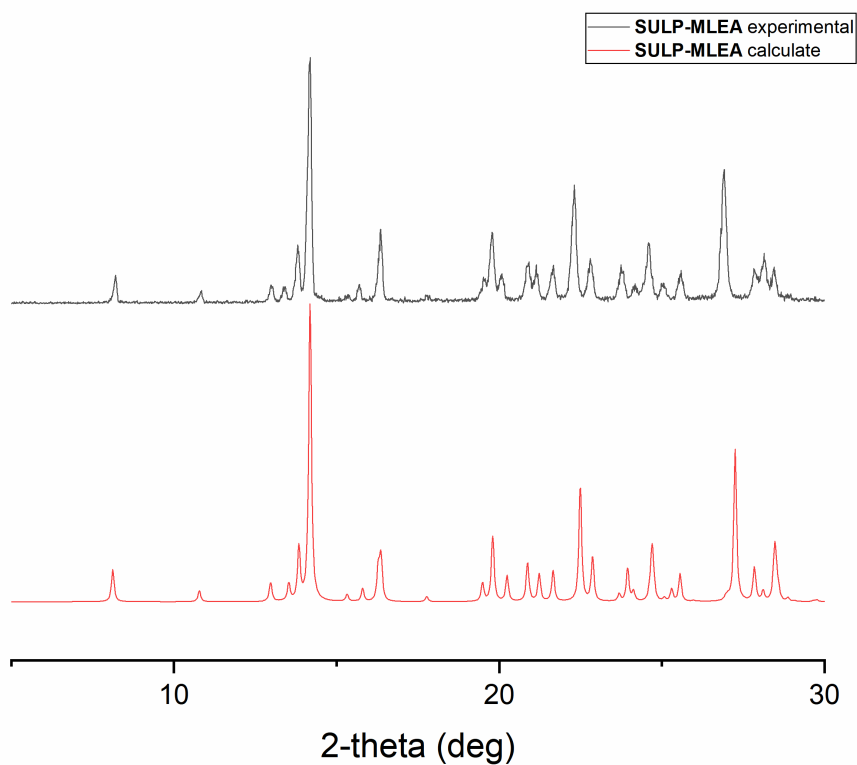

**Figure S27.** Superimposition of the experimental X-ray powder diffractogram collected on the bulk powder of **SULP-MLEA** and the simulated powder pattern calculated from the structure solved via SCXRD.

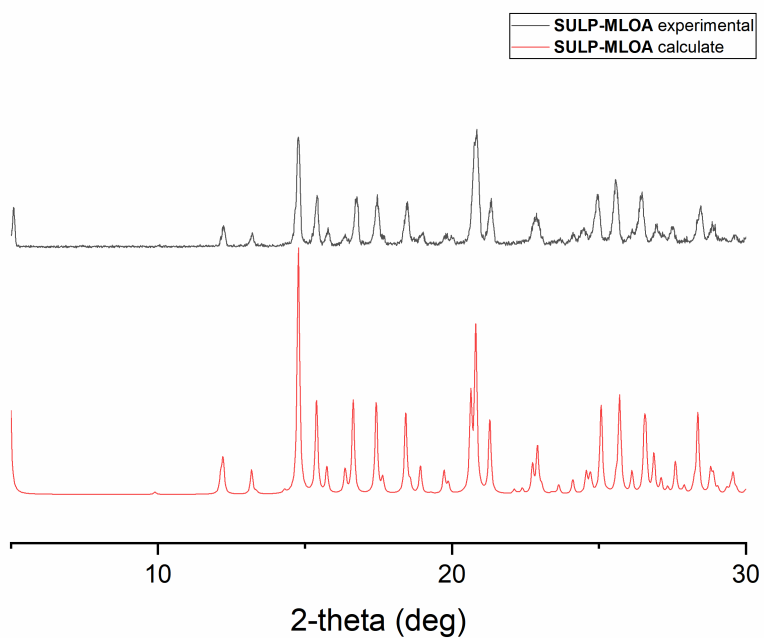

**Figure S28.** Superimposition of the experimental X-ray powder diffractogram collected on the bulk powder of **SULP-MLOA** and the simulated powder pattern calculated from the structure solved via SCXRD.

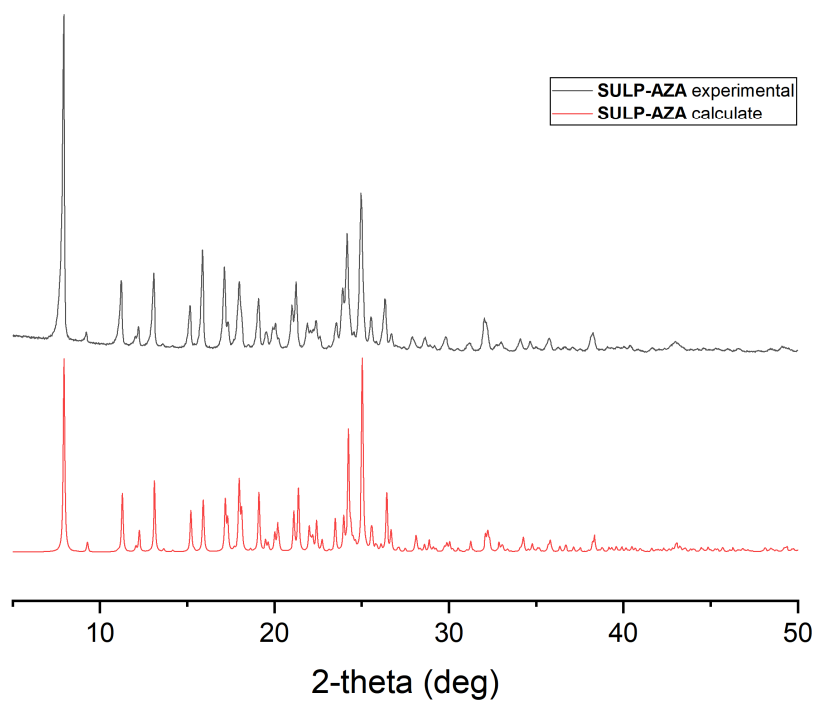

**Figure S29.** Superimposition of the experimental X-ray powder diffractogram collected on the bulk powder of **SULP-AZA** and the simulated powder pattern calculated from the structure solved via SCXRD.

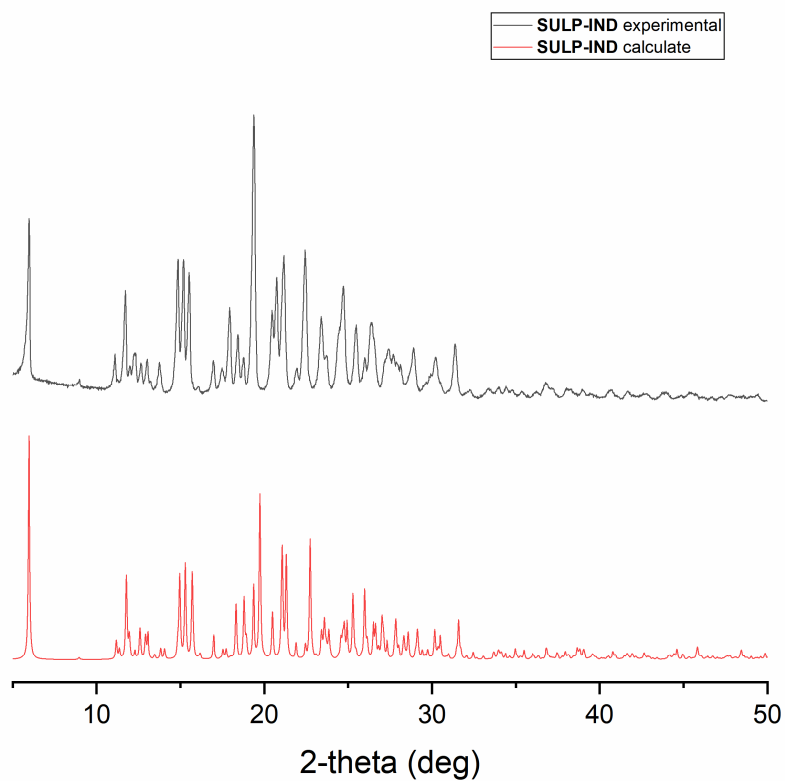

**Figure S30.** Superimposition of the experimental X-ray powder diffractogram collected on the bulk powder of **SULP-IND** and the simulated powder pattern calculated from the structure solved via SCXRD.

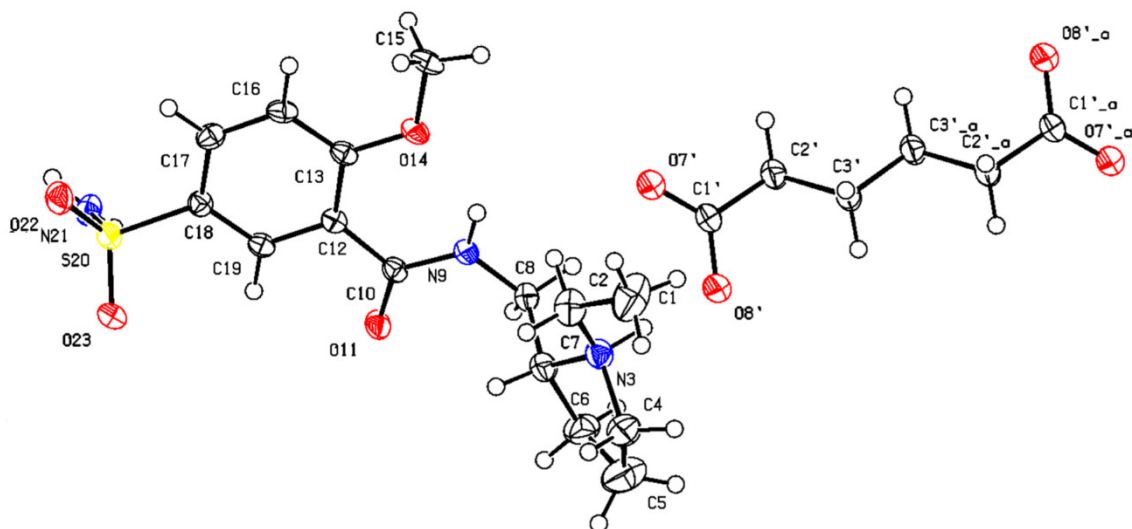

**Figure S31.** Ortep drawing of **SULP-ADPA**. All non-hydrogen atoms are shown as ellipsoids at the 50% probability level. H atoms (isotropically refined) are reported in ball-and-stick style for the sake of clarity. Colour code: red = O, yellow = S, blue = N, white = C-H. Atoms labelled with “\_a” suffix are symmetrically generated.

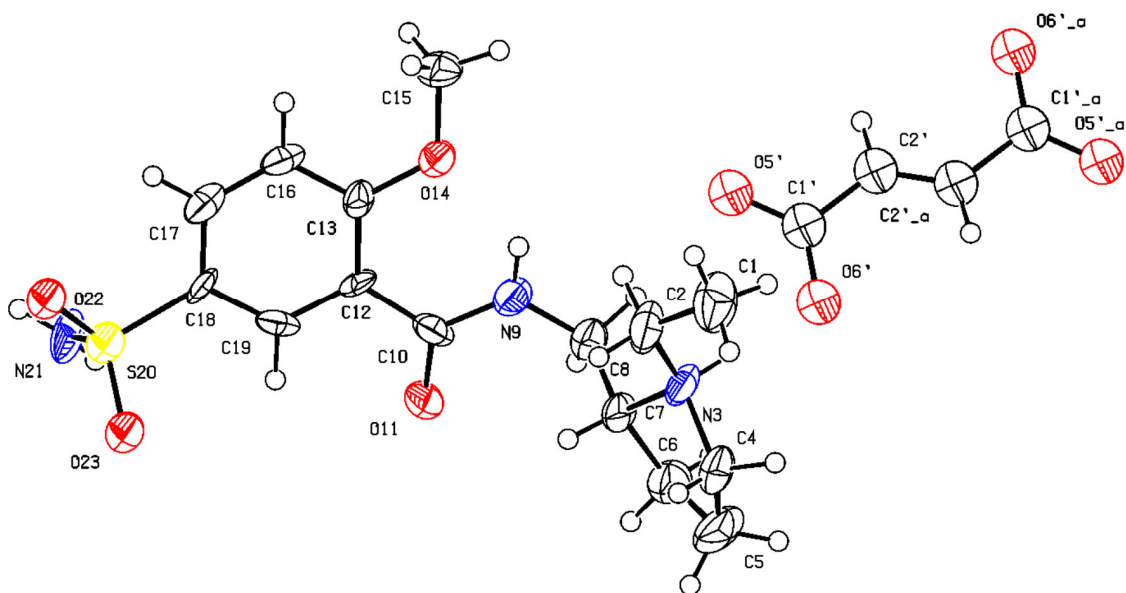

**Figure S32.** Ortep drawing of **SULP-FA**. All non-hydrogen atoms are shown as ellipsoids at the 50% probability level. H atoms (isotropically refined) are reported in ball-and-stick style for the sake of clarity. Colour code: red = O, yellow = S, blue = N, white = C-H. Atoms labelled with “\_a” suffix are symmetrically generated.



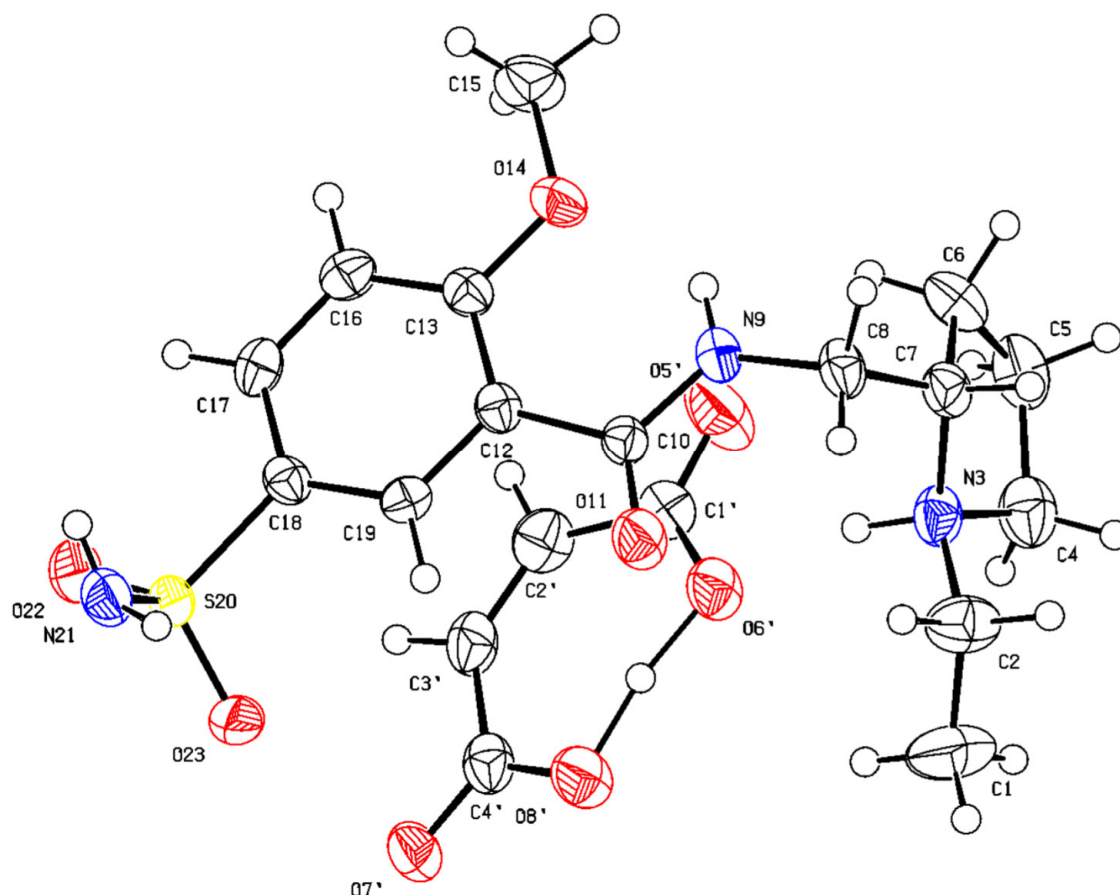

**Figure S33.** Ortep drawing of **SULP-MLEA**. All non-hydrogen atoms are shown as ellipsoids at the 50% probability level. H atoms (isotropically refined) are reported in ball-and-stick style for the sake of clarity. Colour code: red = O, yellow = S, blue = N, white = C-H.

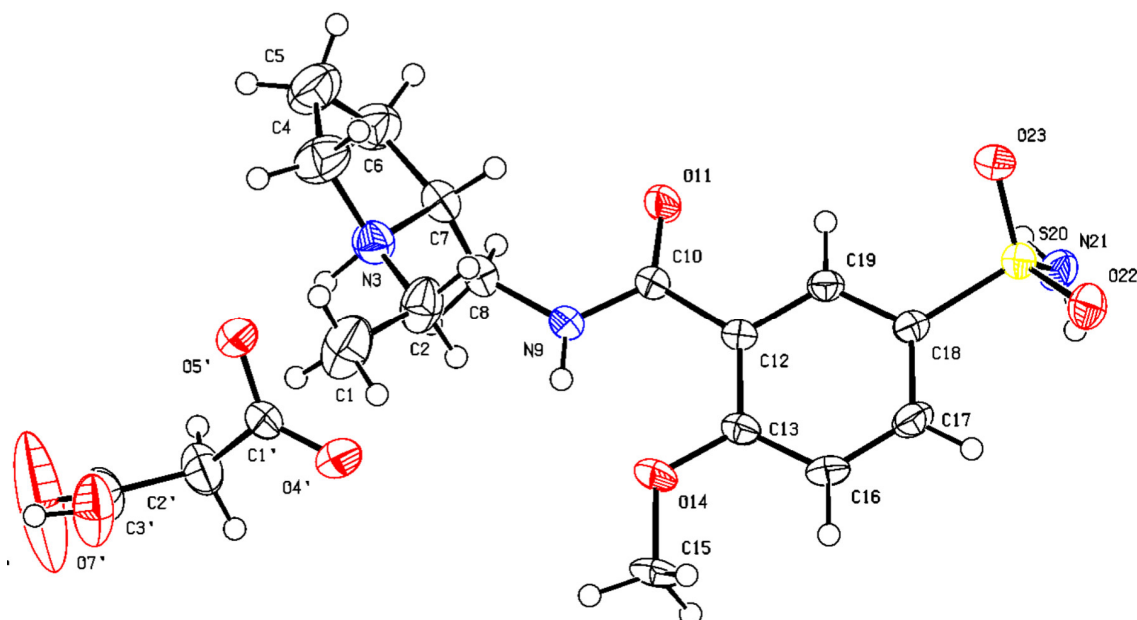

**Figure S34.** Ortep drawing of **SULP-MLOA**. All non-hydrogen atoms are shown as ellipsoids at the 50% probability level. H atoms (isotropically refined) are reported in ball-and-stick style for the sake of clarity. Colour code: red = O, yellow = S, blue = N, white = C-H.

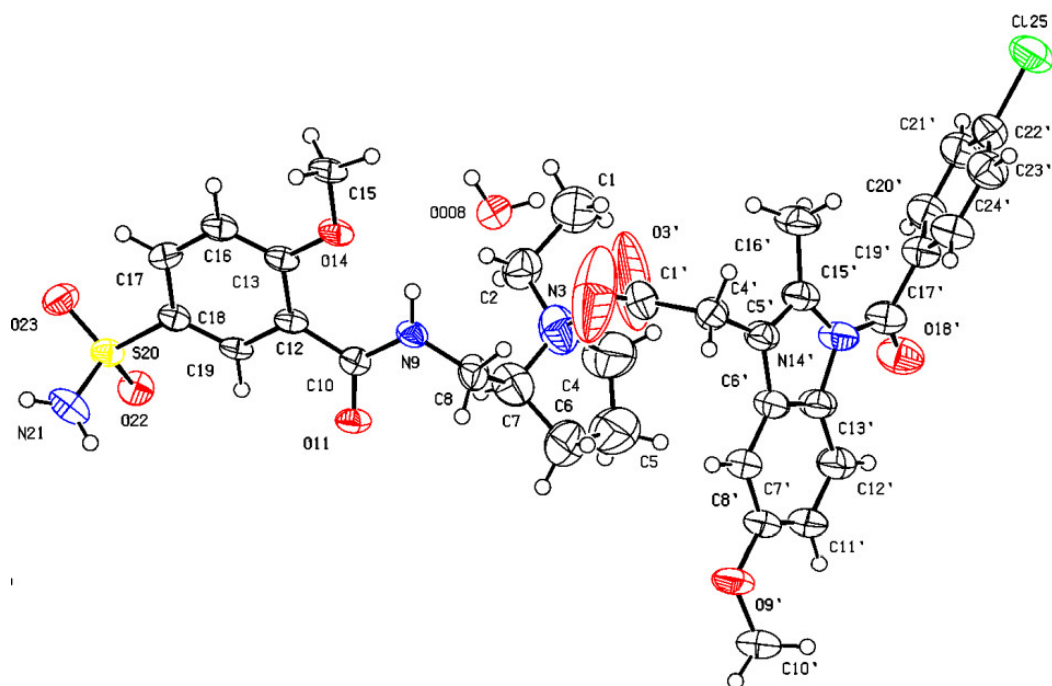

**Figure S35.** Ortep drawing of **SULP-IND**. All non-hydrogen atoms are shown as ellipsoids at the 50% probability level. H atoms (isotropically refined) are reported in ball-and-stick style for the sake of clarity. Colour code: red = O, yellow = S, blue = N, green = Cl, white = C-H.

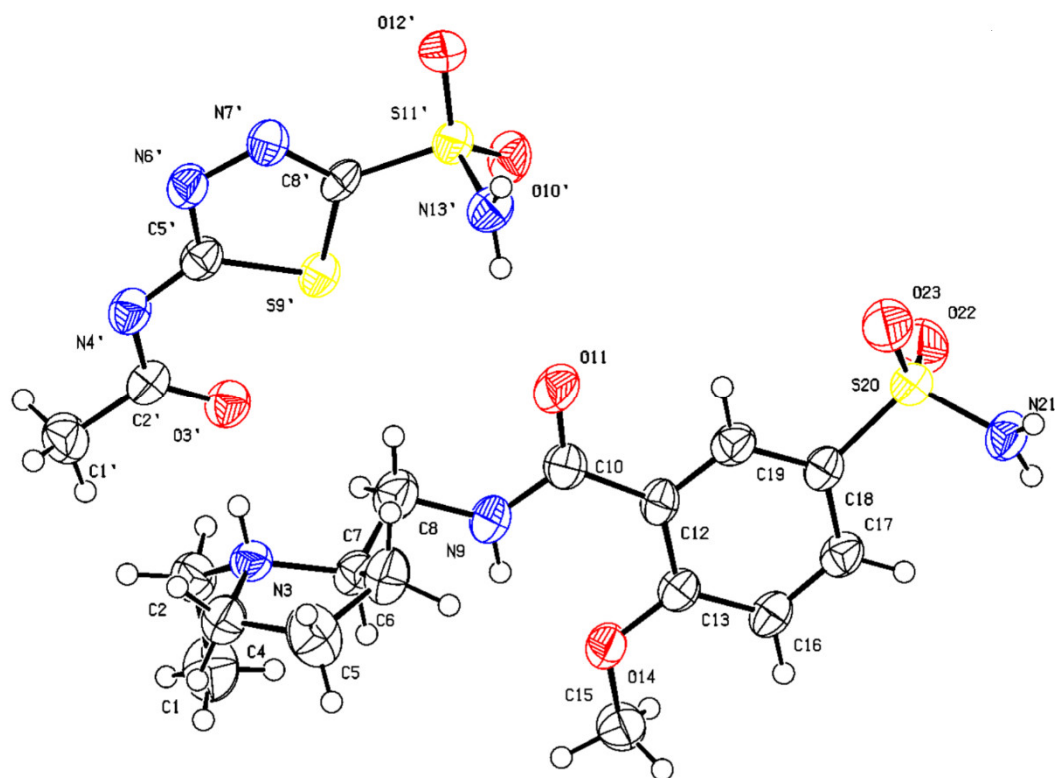

**Figure S36.** Ortep drawing of **SULP-AZA**. All non-hydrogen atoms are shown as ellipsoids at the 50% probability level. H atoms (isotropically refined) are reported in ball-and-stick style for the sake of clarity. Colour code: red = O, yellow = S, blue = N, white = C-H.

**Table S3.** H-bonds interactions for all the crystal structures.

|           | Atoms     | Distance (Å) |           | Atoms     | Distance (Å) |          | Atoms      | Distance (Å) |
|-----------|-----------|--------------|-----------|-----------|--------------|----------|------------|--------------|
| SULP-ADPA | N3···O8'  | 2.64(2)      | SULP-FA   | N3···O6'  | 2.69(2)      | SULP-IND | N3···O3'   | 2.75(2)      |
|           | N3···O10' | 2.64(2)      |           | N3···O8'  | 2.69(2)      |          | N21···O11  | 3.00(2)      |
|           | N21···O7' | 2.78(1)      |           | N21···O5' | 2.82(3)      |          | Ow···O2'   | 2.89(1)      |
|           | N21···O9' | 2.78(1)      |           | N21···O7' | 2.82(3)      |          | Ow···O23   | 2.93(2)      |
|           | N21···O11 | 2.90(2)      |           | N21···O11 | 2.98(2)      |          | N9···O14   | 2.66(3)      |
|           | N9···O14  | 2.67(2)      |           | N21···O14 | 2.66(3)      |          |            |              |
|           | Atoms     | Distance (Å) |           | Atoms     | Distance (Å) |          | Atoms      | Distance (Å) |
| SULP-MLEA | N3···O6'  | 2.78(3)      | SULP-MLOA | N3···O5'  | 2.72(2)      | SULP-AZA | N3···N7'   | 2.90(4)      |
|           | N21···O5' | 2.84(2)      |           | N21···O11 | 2.91(1)      |          | N21···O10' | 2.96(3)      |
|           | N21···O7' | 2.83(1)      |           | N21···O4' | 2.80(1)      |          | N21···O3'  | 2.95(2)      |
|           | N9···O14  | 2.61(5)      |           | N9···O14  | 2.67(2)      |          | O11···N13' | 2.86(5)      |
|           | O5'···O8' | 2.44(2)      |           | O5···O7'  | 2.58(3)      |          | N4'···N13' | 2.97(2)      |
|           |           |              |           |           |              |          |            |              |

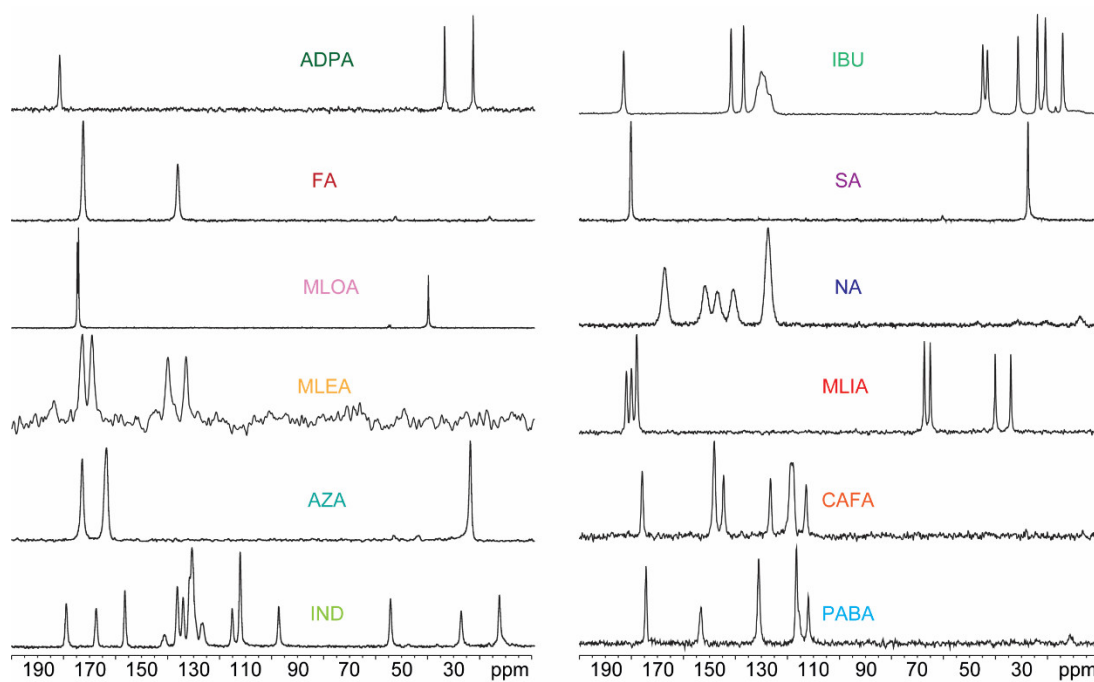

**Figure S37.**  $^{13}\text{C}$  (100.63 MHz) CPMAS spectra of the 12 coformers acquired with a spinning speed of 12 kHz at room temperature.

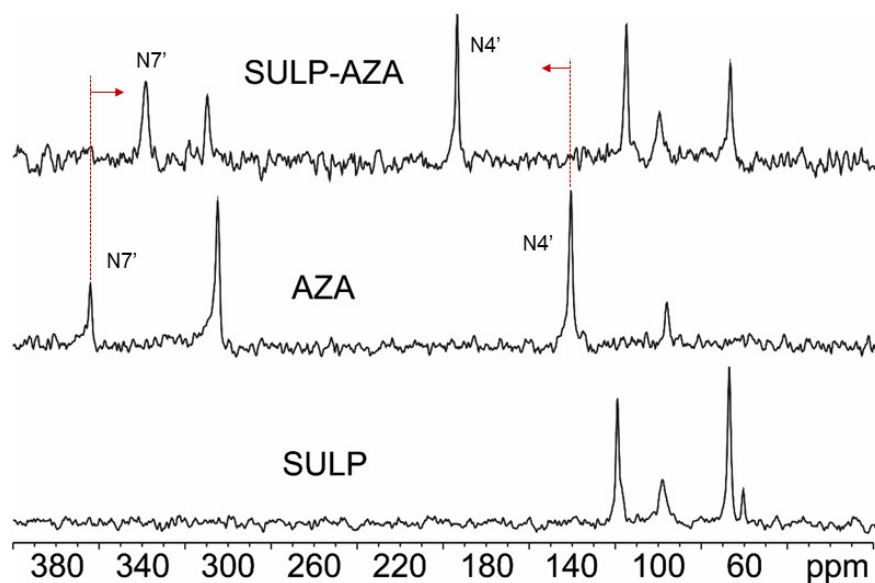

**Figure S38.**  $^{15}\text{N}$  (40.56 MHz) CPMAS spectra of **Sulp-AZA**, **Sulp** and **AZA** acquired with a spinning speed of 8 kHz at room temperature.

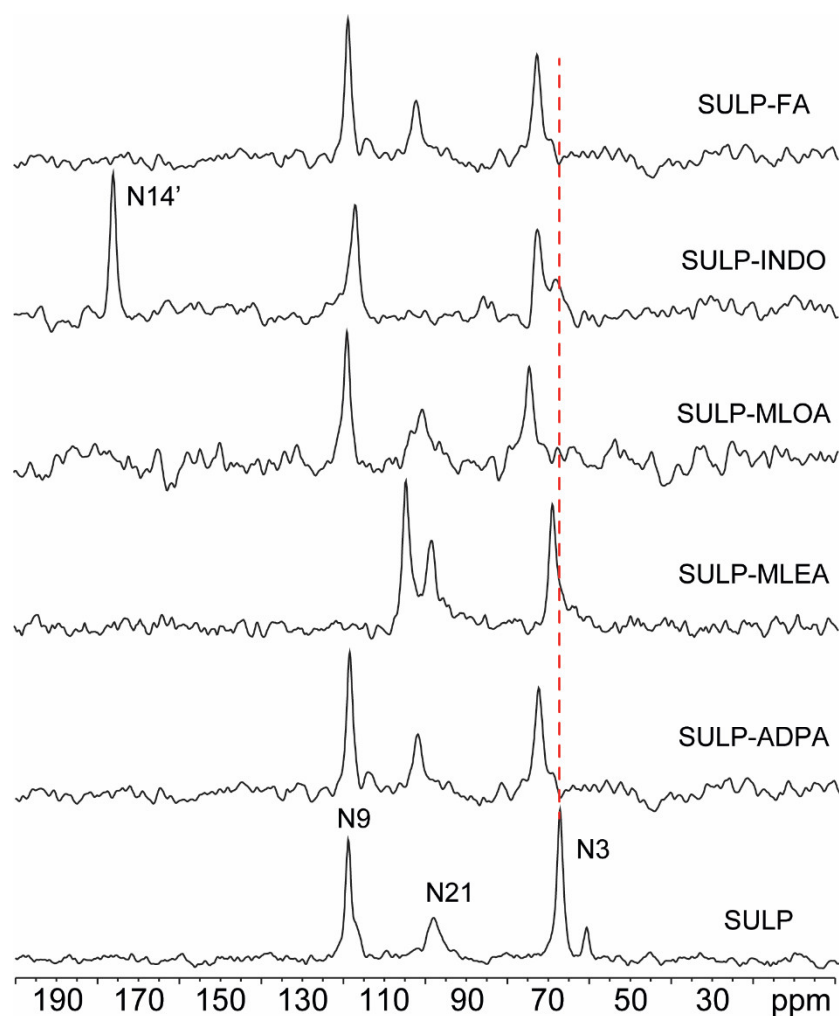

**Figure S39.**  $^{15}\text{N}$  (40.56 MHz) CPMAS spectra of **Sulp**, **Sulp-ADPA**, **Sulp-MLEA**, **Sulp-MLOA**, **Sulp-INDO** and **Sulp-FA** acquired with a spinning speed of 8 kHz at room temperature.

**Table S4.**  $^{13}\text{C}$  and  $^{15}\text{N}$  experimental and computed chemical shifts and relative RMSEs for the Sulp-ADPA adduct. Atom numbering refers to Schemes I and II.

| Sulp-ADPA |                       |       |                       |       |
|-----------|-----------------------|-------|-----------------------|-------|
| #Atom     | $^{13}\text{C}$ (ppm) |       | $^{15}\text{N}$ (ppm) |       |
|           | Exp                   | Calc  | Exp                   | Calc  |
| 1         | 11.5                  | 8.6   |                       |       |
| 1', 6'    | 182.2                 | 186.5 |                       |       |
| 2         | 47.9                  | 46.1  |                       |       |
| 2', 5'    | 39.2                  | 37.6  |                       |       |
| 3         |                       |       | 73.6                  | 68.5  |
| 3', 4'    | 28.7                  | 29.1  |                       |       |
| 4         | 52.6                  | 51.0  |                       |       |
| 5         | 21.0                  | 20.0  |                       |       |
| 6         | 28.7                  | 26.6  |                       |       |
| 7         | 67.9                  | 66.9  |                       |       |
| 8         | 39.2                  | 36.4  |                       |       |
| 9         |                       |       | 119.2                 | 119.4 |
| 10        | 164.6                 | 165.2 |                       |       |
| 12        | 120.1                 | 120.7 |                       |       |
| 13        | 159.9                 | 162.2 |                       |       |
| 15        | 56.5                  | 56.3  |                       |       |
| 16        | 111.6                 | 113.4 |                       |       |
| 17        | 130.0                 | 130.1 |                       |       |
| 18        | 137.5                 | 142.2 |                       |       |
| 19        | 130.0                 | 130.2 |                       |       |
| 21        |                       |       | 102.6                 | 107.5 |
| RMSE      | 2.1                   |       | 4.1                   |       |

**Table S5.**  $^{13}\text{C}$  and  $^{15}\text{N}$  experimental and computed chemical shifts and relative RMSEs for the Sulp-FA adduct. Atom numbering refers to Schemes I and II.

| Sulp-FA |                       |       |                       |       |
|---------|-----------------------|-------|-----------------------|-------|
| #Atom   | $^{13}\text{C}$ (ppm) |       | $^{15}\text{N}$ (ppm) |       |
|         | Exp                   | Calc  | Exp                   | Calc  |
| 1       | 12.0                  | 9.8   |                       |       |
| 1'/4'   | 172.6                 | 177.9 |                       |       |
| 2       | 47.4                  | 45.7  |                       |       |
| 2'/3'   | 135.4                 | 138.8 |                       |       |
| 3       |                       |       | 73.6                  | 71.3  |
| 4       | 53.0                  | 49.8  |                       |       |
| 5       | 20.1                  | 17.3  |                       |       |
| 6       | 28.9                  | 26.2  |                       |       |
| 7       | 67.9                  | 67.2  |                       |       |
| 8       | 39.4                  | 36.0  |                       |       |
| 9       |                       |       | 119.2                 | 121.4 |
| 10      | 164.8                 | 164.9 |                       |       |
| 12      | 120.8                 | 121.1 |                       |       |
| 13      | 160.5                 | 161.8 |                       |       |
| 15      | 56.7                  | 56.0  |                       |       |
| 16      | 112.0                 | 113.2 |                       |       |
| 17      | 130.1                 | 130.7 |                       |       |
| 18      | 135.4                 | 141.3 |                       |       |
| 19      | 130.1                 | 129.4 |                       |       |
| 21      |                       |       | 102.6                 | 102.7 |
| RMSE    | 2.7                   |       | 1.9                   |       |

**Table S6.**  $^{13}\text{C}$  and  $^{15}\text{N}$  experimental and computed chemical shifts and relative RMSEs for the Sulp-MLEA adduct. Atom numbering refers to Schemes I and II.

| Sulp-MLEA |                       |       |                       |       |
|-----------|-----------------------|-------|-----------------------|-------|
| #Atom     | $^{13}\text{C}$ (ppm) |       | $^{15}\text{N}$ (ppm) |       |
|           | Exp                   | Calc  | Exp                   | Calc  |
| 1         | 10.2                  | 5.6   |                       |       |
| 1'        | 168.9                 | 171.7 |                       |       |
| 2         | 48.8                  | 48.7  |                       |       |
| 2'        | 134.0                 | 137.9 |                       |       |
| 3         |                       |       | 69.2                  | 65.9  |
| 3'        | 136.4                 | 140.9 |                       |       |
| 4         | 53.5                  | 51.0  |                       |       |
| 4'        | 168.9                 | 171.7 |                       |       |
| 5         | 20.0                  | 17.8  |                       |       |
| 6         | 25.4                  | 22.9  |                       |       |
| 7         | 69.8                  | 70.0  |                       |       |
| 8         | 34.1                  | 29.8  |                       |       |
| 9         |                       |       | 104.8                 | 106.5 |
| 10        | 164.5                 | 164.4 |                       |       |
| 12        | 121.0                 | 120.1 |                       |       |
| 13        | 161.0                 | 162.5 |                       |       |
| 15        | 59.0                  | 58.2  |                       |       |
| 16        | 114.1                 | 114.0 |                       |       |
| 17        | 132.7                 | 133.3 |                       |       |
| 18        | 136.4                 | 138.5 |                       |       |
| 19        | 130.1                 | 130.3 |                       |       |
| 21        |                       |       | 98.6                  | 100.2 |
| RMSE      | 2.5                   |       | 2.4                   |       |

**Table S7.**  $^{13}\text{C}$  and  $^{15}\text{N}$  experimental and computed chemical shifts and relative RMSEs for the Sulp-MLOA adduct. Atom numbering refers to Schemes I and II.

| Sulp-MLOA |                       |       |                       |       |
|-----------|-----------------------|-------|-----------------------|-------|
| #Atom     | $^{13}\text{C}$ (ppm) |       | $^{15}\text{N}$ (ppm) |       |
|           | Exp                   | Calc  | Exp                   | Calc  |
| 1         | 12.1                  | 11.7  |                       |       |
| 1'        | 175.5                 | 179.8 |                       |       |
| 2         | 48.5                  | 46.1  |                       |       |
| 2'        | 45.7                  | 42.7  |                       |       |
| 3         |                       |       | 74.6                  | 70.7  |
| 3'        | 170.5                 | 176.1 |                       |       |
| 4         | 53.3                  | 51.0  |                       |       |
| 5         | 20.6                  | 18.5  |                       |       |
| 6         | 29.2                  | 26.7  |                       |       |
| 7         | 68.2                  | 65.8  |                       |       |
| 8         | 39.2                  | 37.2  |                       |       |
| 9         |                       |       | 118.8                 | 119.2 |
| 10        | 164.7                 | 164.7 |                       |       |
| 12        | 120.4                 | 120.6 |                       |       |
| 13        | 160.1                 | 162.1 |                       |       |
| 15        | 57.0                  | 56.6  |                       |       |
| 16        | 111.6                 | 112.6 |                       |       |
| 17        | 130.2                 | 130.3 |                       |       |
| 18        | 137.3                 | 141.5 |                       |       |
| 19        | 130.2                 | 130.3 |                       |       |
| 21        |                       |       | 100.6                 | 104.1 |
| RMSE      | 2.5                   |       | 3.0                   |       |



**Table S8.**  $^{13}\text{C}$  and  $^{15}\text{N}$  experimental and computed chemical shifts and relative RMSEs for the Sulp-IND adduct. Atom numbering refers to Schemes I and II.

| Sulp-IND |                       |       |                       |       |
|----------|-----------------------|-------|-----------------------|-------|
| #Atom    | $^{13}\text{C}$ (ppm) |       | $^{15}\text{N}$ (ppm) |       |
|          | Exp                   | Calc  | Exp                   | Calc  |
| 1        | 13.2                  | 10.4  |                       |       |
| 1'       | 174.9                 | 176.8 |                       |       |
| 2        | 48.6                  | 47.2  |                       |       |
| 3        |                       |       | 72.9                  | 64.9  |
| 4        | 53.6                  | 51.1  |                       |       |
| 4'       | 33.2                  | 34.0  |                       |       |
| 5        | 20.7                  | 17.9  |                       |       |
| 5'       | 120.7                 | 121.1 |                       |       |
| 6        | 28.9                  | 27.4  |                       |       |
| 6'       | 134.6                 | 134.6 |                       |       |
| 7        | 66.4                  | 63.7  |                       |       |
| 7'       | 105.0                 | 103.2 |                       |       |
| 8        | 41.1                  | 38.6  |                       |       |
| 8'       | 157.3                 | 159.8 |                       |       |
| 9        |                       |       | 117.0                 | 111.1 |
| 10       | 164.8                 | 164.4 |                       |       |
| 10'      | 56.5                  | 55.2  |                       |       |
| 11'      | 107.5                 | 105.4 |                       |       |
| 12       | 118.9                 | 120.8 |                       |       |
| 12'      | 118.1                 | 118.9 |                       |       |
| 13       | 160.5                 | 161.7 |                       |       |
| 13'      | 132.7                 | 132.7 |                       |       |
| 14'      |                       |       | 175.8                 | 178.5 |
| 15       | 55.8                  | 55.0  |                       |       |
| 15'      | 136.3                 | 138.3 |                       |       |
| 16       | 111.8                 | 112.1 |                       |       |
| 16'      | 16.1                  | 15.9  |                       |       |
| 17       | 129.4                 | 129.2 |                       |       |
| 17'      | 167.7                 | 169.1 |                       |       |
| 18       | 136.3                 | 137.4 |                       |       |
| 19       | 128.6                 | 129.0 |                       |       |
| 19'      | 134.6                 | 136.7 |                       |       |
| 20'      | 130.1                 | 129.4 |                       |       |
| 21       |                       |       | 86.1                  | 97.7  |
| 21'      | 131.7                 | 132.5 |                       |       |
| 22'      | 139.4                 | 144.7 |                       |       |
| 23'      | 130.1                 | 130.8 |                       |       |
| 24'      | 133.7                 | 134.1 |                       |       |
| RMSE     | 1.8                   |       | 7.8                   |       |

**Table S9.**  $^{13}\text{C}$  and  $^{15}\text{N}$  experimental and computed chemical shifts and relative RMSEs for the Sulp-AZA adduct. Atom numbering refers to Schemes I and II.

| Sulp-AZA |                       |       |                       |       |
|----------|-----------------------|-------|-----------------------|-------|
| #Atom    | $^{13}\text{C}$ (ppm) |       | $^{15}\text{N}$ (ppm) |       |
|          | Exp                   | Calc  | Exp                   | Calc  |
| 1        | 6.5                   | 1.8   |                       |       |
| 1'       | 27.1                  | 24.4  |                       |       |
| 2        | 43.1                  | 40.7  |                       |       |
| 2'       | 179.5                 | 181.7 |                       |       |
| 3        |                       |       | 68.4                  | 66.6  |
| 4        | 51.4                  | 48.6  |                       |       |
| 4'       |                       |       | 194.8                 | 203.3 |
| 5        | 23.1                  | 21.7  |                       |       |
| 5'       | 171.2                 | 173.0 |                       |       |
| 6        | 29.0                  | 26.8  |                       |       |
| 6'       |                       |       | 310.3                 | 314.3 |
| 7        | 61.6                  | 62.4  |                       |       |
| 7'       |                       |       | 338.8                 | 332.7 |
| 8        | 39.5                  | 36.4  |                       |       |
| 8'       | 162.1                 | 166.6 |                       |       |
| 9        |                       |       | 116.5                 | 119.3 |
| 10       | 159.9                 | 161.3 |                       |       |
| 12       | 119.9                 | 120.0 |                       |       |
| 13       | 159.9                 | 162.4 |                       |       |
| 13'      |                       |       | 101.3                 | 106.7 |
| 15       | 57.8                  | 58.6  |                       |       |
| 16       | 114.5                 | 115.3 |                       |       |
| 17       | 129.4                 | 129.9 |                       |       |
| 18       | 136.3                 | 140.6 |                       |       |
| 19       | 127.3                 | 127.1 |                       |       |
| 21       |                       |       | 101.3                 | 88.5  |
| RMSE     | 2.5                   |       | 6.9                   |       |
